# Supplementary material for: Evaluation of short-term hair follicle storage conditions for maintenance of RNA integrity
Source: PubMed Central journal article supplement (PMC11142484; doi:10.1371/journal.pone.0294089), 2024-05-31
Supplement: pone.0294089.s003.pdf [file pone.0294089.s003.pdf]

Dear authors,

Thank you for the submitted review.

I can agree with your choice to do a repeated, one way ANOVA to test for the effect of storage. By doing so you consider the within-subject correlation in your data. But I believe my suggestion of using a two-factor model would also work.

With respect to the power I do not agree with the computations or the wording on line 330. When you do a post-hoc analysis you need to use the averages of your data. In that case the computation of delta is not appropriate. Delta is the max(mean)-min(mean) in the data. For RIN your means are 9.475, 9.25 and 9.725 so the delta is 0.475 and the RootMSE=0.48 which leads to a ratio of approx.= 1 . The power to detect differences of this size is only 17%.

$\Delta/\sigma = 9.7$  (Max value observed in present study) – 7 (minimum reported value from literature) / 0.48 (SD)  $\Rightarrow \Delta/\sigma = 5.6$ , the

However if you would argue that you wanted to test if RIN values would be too low for any treatment (e.g. RIN=7) then I could follow your reasoning but that is not a proper post hoc test. So you could rephrase that you wanted to detect very large differences for which n=4 is sufficient.

“The small sample size used in this study may have represented a limitation. However, a post-hoc examination of our results using the B12 Table for determining sample size for analysis of variance from Kutner et al, (2005) (28), indicated that our sample size of n=4 was sufficient for adequate statistical power.

The output in SAS that I obtained on your data for RIN

#### The GLMPower Procedure

#### Fixed Scenario Elements

|                          |         |
|--------------------------|---------|
| Dependent Variable       | RIN     |
| Source                   | storage |
| Error Standard Deviation | 0.48    |
| Total Sample Size        | 12      |
| Alpha                    | 0.05    |
| Test Degrees of Freedom  | 2       |
| Error Degrees of Freedom | 9       |

#### Computed Power

Power

0.171
